# Supplementary material for: Rotaviruses in Wild Ungulates from Germany, 2019–2022
Source: MDPI journal article supplement (doi:10.3390/microorganisms11030566), 2023-02-24
Supplement: s1 [file s1]

Supplementary Table S1 for Article:

## **Rotaviruses in wild ungulates from Germany, 2019-2022**

**Nadine Althof , Eva Trojnar and Reimar Johne**

**Supplementary Table S1:** Sample numbers according to the hunting area and animal species.

| Hunting area | Name of Hunting area (administrative district)                     | Fallow deer samples | Wild boar samples | Roe deer samples | Red deer samples |
|--------------|--------------------------------------------------------------------|---------------------|-------------------|------------------|------------------|
| A            | <b>Kartzow</b><br>(Potsdam-Mittelmark)                             | 0                   | 16                | 16               | 0                |
| B            | <b>Rüthnicker Heide</b><br>(Oberhavel)                             | 57                  | 18                | 1                | 1                |
| C            | <b>Hohensaaten/Hohenfinow</b><br>(Märkisch-Oderland)               | 0                   | 1                 | 8                | 0                |
| D            | <b>Biesow-Harnekop</b><br>(Märkisch-Oderland)                      | 0                   | 13                | 16               | 6                |
| E            | <b>Lehnitz/Borgsdorf</b><br>(Oberhavel)                            | 0                   | 27                | 8                | 10               |
| F            | <b>Horstwalde</b><br>(Teltow-Fläming)                              | 4                   | 14                | 13               | 0                |
| G            | <b>Niederlehme West/Krummeluch</b><br>(Dahme-Spreewald/Oder-Spree) | 0                   | 15                | 7                | 0                |
| H            | <b>Markgrafpieske</b><br>(Oder-Spree)                              | 0                   | 3                 | 6                | 0                |
| I            | <b>Zerwelinener Heide</b><br>(Uckermark)                           | 28                  | 9                 | 5                | 1                |
| J            | <b>Platkow</b><br>(Märkisch-Oderland)                              | 0                   | 1                 | 5                | 0                |
| K            | <b>Wilkendorf</b><br>(Märkisch-Oderland)                           | 1                   | 9                 | 7                | 2                |
| L            | <b>Klosterdorf</b><br>(Märkisch-Oderland)                          | 0                   | 3                 | 0                | 0                |
| M            | <b>Wittstock/Rossower Heide</b><br>(Ostprignitz-Ruppin)            | 0                   | 22                | 9                | 6                |
| N            | <b>Güterfelde</b><br>(Potsdam-Mittelmark)                          | 0                   | 6                 | 8                | 0                |
| O            | <b>Klosterfelde</b><br>(Oberhavel)                                 | 0                   | 0                 | 4                | 0                |
| P            | <b>Chorin</b><br>(Barnim)                                          | 0                   | 0                 | 4                | 0                |
| Q            | <b>Niederlehme Ost/Rauen</b><br>(Oder-Spree)                       | 0                   | 1                 | 2                | 0                |
| R            | <b>Streganz</b><br>(Dahme-Spreewald)                               | 0                   | 9                 | 11               | 1                |
| S            | <b>Storkow/Grubenmühle</b><br>(Oder-Spree)                         | 0                   | 13                | 14               | 1                |
| T            | <b>Neu-Stahnsdorf</b><br>(Oder-Spree)                              | 0                   | 1                 | 2                | 0                |
| U            | <b>Barsdorf/Tornow</b><br>(Oberhavel)                              | 0                   | 0                 | 2                | 0                |
| V            | <b>Lehnin</b><br>(Potsdam-Mittelmark)                              | 5                   | 3                 | 1                | 0                |
| W            | <b>Groß-Behnitz</b><br>(Havelland)                                 | 0                   | 13                | 2                | 0                |
| X            | <b>Oranienburg</b><br>(Oberhavel)                                  | 0                   | 0                 | 1                | 0                |
| <b>Total</b> |                                                                    | <b>95</b>           | <b>197</b>        | <b>152</b>       | <b>28</b>        |
